# Supplementary material for: A new insight into the reaction behaviors of side-chain alkylation of toluene with methanol over CsX
Source: Royal Society of Chemistry journal article supplement (doi:10.1039/c8cy00597d), 2018-01-01
Supplement: c8cy00597d1.pdf [file c8cy00597d1.pdf]

## Supporting information

### A New insight into the Reaction Behaviors of Side-chain Alkylation of Toluene with Methanol over CsX

PeidongLi<sup>a,b,c</sup>, QiaoHan<sup>a,b,c</sup>, XiaominZhang<sup>a</sup>, YangyangYuan<sup>a</sup>, YanfeiZhang<sup>a,b,c</sup>, HongchenGuo<sup>c</sup>, Li  
Xu<sup>\*a</sup> and Lei Xu<sup>\*a</sup>

<sup>a</sup> National Laboratory for Clean Energy, Dalian Institute of Chemical Physics, Chinese Academy of Sciences, Dalian 116023, People's Republic of China

<sup>b</sup> University of Chinese Academy of Sciences, Beijing 100049, People's Republic of China

<sup>c</sup> Department of Catalytic Chemistry and Engineering & State Key Laboratory of Fine Chemicals, Dalian University of Technology, Dalian 116012, People's Republic of China.

\*E-mail addresses: xulei808@dicp.ac.cn, xuli@dicp.ac.cn.

Fig. S1 N<sub>2</sub> adsorption-desorption isotherms at 77K and pore size distributions of the indicated catalysts

Fig. S2 XRD spectra of SiO<sub>2</sub> and H<sub>3</sub>PO<sub>4</sub>/SiO<sub>2</sub>.

Fig. S3 Catalysts loading position of H<sub>3</sub>PO<sub>4</sub>/SiO<sub>2</sub> and CsX, position A for H<sub>3</sub>PO<sub>4</sub>/SiO<sub>2</sub> and position B for CsX.

Fig. S4 GC-MS analysis of hydrocarbon species trapped in zeolite pores after conversion of styrene with methanol at 430 °C for NaX, the reaction time is 50min.

Table S1 The details of cesium ion exchange process for different CsX.

Table S2. Reaction results for depolymerization of trimethylol on H<sub>3</sub>PO<sub>4</sub>/SiO<sub>2</sub>.

Table S3 Details for reaction results of alkylation of toluene with methanol on indicated catalysts.

**Table S1** The details of cesium ion exchange process for different CsX.

| Catalysts | liquid/solid ratio (mL/g) | Temperature (°C) | ion exchange process*                                                                                          |
|-----------|---------------------------|------------------|----------------------------------------------------------------------------------------------------------------|
| CsX-1     | 8:1                       | 80               | Exchanged with 0.2 mol/L CsCl for 4h.                                                                          |
| CsX-2     | 8:1                       | 80               | Exchanged with 0.2 mol/L CsCl for 4h, repeated one times.                                                      |
| CsX-3     | 8:1                       | 80               | Exchanged with 0.2 mol/L CsCl for 4h, repeated two more times.                                                 |
| CsX-4     | 8:1                       | 80               | Exchanged with 0.2 mol/L CsCl for 4h , repeated two more times, and then exchanged with 0.1mol/L CsCl for 1 h. |
| CsX-5     | 8:1                       | 80               | Exchanged with 0.2 mol/L CsCl for 4h , repeated two more times, and then exchanged with 0.4mol/L CsCl for 4 h. |
| CsX-6     | 8:1                       | 80               | Exchanged with 0.5 mol/L CsCl for 4h, repeated three more times.                                               |

\* After each ion exchange process, the slurry was filtered and washed by a large amount of deionized water for several times.

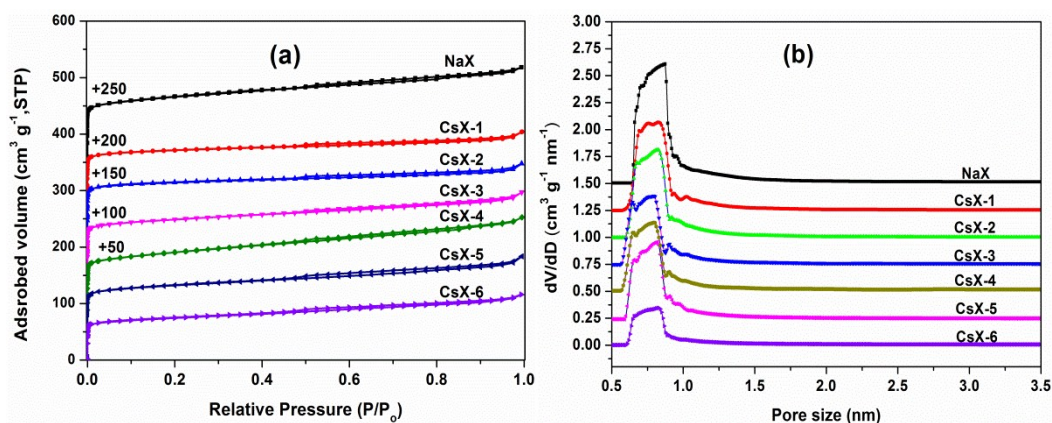

Fig. S1  $N_2$  adsorption-desorption isotherms at 77K (a) and pore size distributions of the indicated catalysts (b), the pore size distributions were calculated by SF method.

## Depolymerization of triformol to formaldehyde

The catalyst for depolymerization of triformol was prepared by incipient-wetness impregnation of Mesoporous  $SiO_2$  (Qingdao Ocean Chemical CO., Ltd., China.) with  $H_3PO_4$  (Tianjin Kermel Chemical Reagent Co. Ltd., 85 %) at room temperature, after stewed overnight, dried at 110 °C for 4h and then calcined in air at 450 °C for 4h. The amount of  $H_3PO_4$  loadings was 60 wt %, and the catalyst was named as  $H_3PO_4/SiO_2$ .

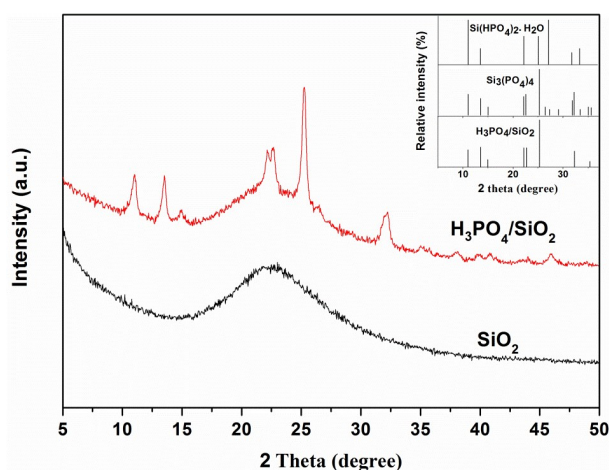

Fig. S2 XRD spectra of  $SiO_2$  and  $H_3PO_4/SiO_2$ .

XRD patterns of  $SiO_2$  and  $H_3PO_4/SiO_2$  are in Fig. 2. Only a broad peak around  $22^\circ$  can be detected on the XRD spectrum of  $SiO_2$ , which can be attributed to

amorphous SiO<sub>2</sub>. After loading of H<sub>3</sub>PO<sub>4</sub>, a series of new peaks appeared with the position matching well with Si<sub>3</sub>(PO<sub>4</sub>)<sub>4</sub> (PDF NO. 22-1380) in the inset figure. Actually, the peak position of Si<sub>3</sub>(PO<sub>4</sub>)<sub>4</sub> and Si(HPO<sub>4</sub>)<sub>2</sub>•H<sub>2</sub>O (PDF NO. 18-1168) is very similar with each other. The existence of Si(HPO<sub>4</sub>)<sub>2</sub>•H<sub>2</sub>O species can not be omitted.<sup>1</sup> Thus, it is reasonable to suggest that both Si(HPO<sub>4</sub>)<sub>2</sub>•H<sub>2</sub>O and Si<sub>3</sub>(PO<sub>4</sub>)<sub>4</sub> were formed on H<sub>3</sub>PO<sub>4</sub>/SiO<sub>2</sub>.

## Reference

1Y. Maki, K. Sato, A. Isobe, N. Iwasa, S. Fujita, M. Shimokawabe and N. Takezawa, Appl. Catal. A: Gen., 1998,**170**, 269-275.

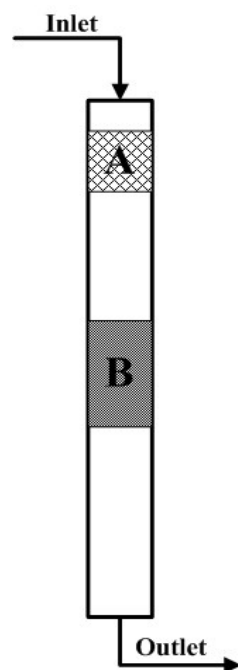

**Fig. S3** Catalysts loading position of H<sub>3</sub>PO<sub>4</sub>/SiO<sub>2</sub> and CsX, position A for H<sub>3</sub>PO<sub>4</sub>/SiO<sub>2</sub> and position B for CsX.

Formaldehyde employed in this work was produced by depolymerization of trimethylol using a H<sub>3</sub>PO<sub>4</sub>/SiO<sub>2</sub> catalyst. The packing structure of H<sub>3</sub>PO<sub>4</sub>/SiO<sub>2</sub> (A) and CsX (B) catalysts is shown in Fig. S3.

The H<sub>3</sub>PO<sub>4</sub>/SiO<sub>2</sub> catalyst was activated in-situ at 335 °C under a flow of air (40 mL/min) for 90 min and then cooled to the reaction temperature of 295 °C. Before the

side-chain alkylation of toluene with formaldehyde, a liquid mixture of toluene and triformol with molar ratio of 18:1 was pumped into A at a weight hourly space velocity (WHSV) of 2 h<sup>-1</sup> with helium at a flow rate of 10 mL/min (run number 1). Before the styrene conversion with formaldehyde, the feedstock is benzene, styrene and triformol with a molar ratio of 16:1:1 (run number 2). The reaction results were shown in Table S2.

**Table S2** Reaction results for depolymerization of triformol on H<sub>3</sub>PO<sub>4</sub>/SiO<sub>2</sub>.

| Run number | Conversion of triformol (mol%) | Yield of formaldehyde (mol%) | Y <sub>ST+EB</sub> <sup>a</sup> | X <sub>(StoEB)</sub> <sup>b</sup> | molar ratio of main compounds in outlet |                                |
|------------|--------------------------------|------------------------------|---------------------------------|-----------------------------------|-----------------------------------------|--------------------------------|
|            |                                |                              |                                 |                                   | toluene: formaldehyde                   | benzene: styrene: formaldehyde |
| 1          | 99.31                          | 96.29                        | 0.0013                          | -                                 | 6.1: 1                                  | -                              |
| 2          | 99.48                          | 96.71                        | -                               | 0.034                             | -                                       | 15.7: 1: 2.9                   |

<sup>a</sup>Y<sub>ST+EB</sub>, yield of styrene and ethylbenzene, calculated by 
$$Y_{ST+EB} = \frac{\text{styrene and ethylbenzene}_{outlet}}{3 \times \text{triformol}_{inlet}} \times 100\%$$
 ;

<sup>b</sup>X<sub>(STtoEB)</sub>, conversion of styrene to ethylbenzene, calculated by 
$$X_{(ST\ to\ EB)} = \frac{\text{ethylbenzene}_{outlet}}{\text{styrene}_{inlet}} \times 100\%$$
 .

As shown in Table S2, the conversion of triformol reaches 99%, and yield of formaldehyde is higher than 96% for both run number 1 and 2 experiments. Y<sub>ST+EB</sub> in run number 1 and X<sub>(ST-to-EB)</sub> in run number 2 is close to zero. The molar ratio of toluene to formaldehyde in outlet of run number 1 is 6.1:1, which is close to that of toluene to methanol used in Table 3. And the molar ratio of benzene, styrene and formaldehyde in outlet of run number 2 is 15.7: 1: 2.9, which is close to the molar ratio inlet of benzene, styrene and methanol in conversion of styrene with methanol used in Fig.10. Thus, it is reasonable to employ this experiment system to investigate the reaction behaviour of toluene and formaldehyde and conversion of styrene with formaldehyde.

**Table S3** Details for reaction results of alkylation of toluene with methanol on indicated catalysts.\*

| Components                            | Molar flow rates of different components (mmol/h) |                                 |        |        |        |        |        |        |
|---------------------------------------|---------------------------------------------------|---------------------------------|--------|--------|--------|--------|--------|--------|
|                                       | Reactor feed                                      | Output over different catalysts |        |        |        |        |        |        |
|                                       |                                                   | NaX                             | CsX-1  | CsX-2  | CsX-3  | CsX-4  | CsX-5  | CsX-6  |
| Carbon monoxide                       | -                                                 | 1.079                           | 0.266  | 0.618  | 2.560  | 4.520  | 7.221  | 10.335 |
| Carbon dioxide                        | -                                                 | 0.172                           | 0.045  | 0.021  | 0.068  | 0.082  | 0.139  | 0.263  |
| Methane                               | -                                                 | 0.618                           | 0.633  | 0.030  | 0.028  | 0.029  | 0.042  | 0.071  |
| C <sub>2</sub> -C <sub>5</sub>        | -                                                 | 0.312                           | 0.156  | 0.002  | 0.004  | 0.006  | 0.008  | 0.012  |
| DME                                   | -                                                 | 3.298                           | 3.687  | 2.145  | 1.813  | 1.420  | 0.964  | 0.984  |
| methanol                              | 25.643                                            | 15.443                          | 15.979 | 20.326 | 18.500 | 17.097 | 14.913 | 10.672 |
| benzene                               | -                                                 | 0.013                           | 0.004  | 0.001  | 0.002  | 0.008  | 0.005  | 0.006  |
| Toluene                               | 12.821                                            | 11.524                          | 11.511 | 12.485 | 12.268 | 11.925 | 11.360 | 10.792 |
| Ethylbenzene                          | -                                                 | 0.015                           | 0.010  | 0.034  | 0.166  | 0.408  | 0.810  | 1.487  |
| Xylene                                | -                                                 | 0.884                           | 0.952  | 0.187  | 0.070  | 0.013  | 0.009  | 0.007  |
| Styrene                               | -                                                 | 0.007                           | 0.011  | 0.087  | 0.314  | 0.446  | 0.573  | 0.488  |
| C <sub>9</sub> <sup>+</sup>           | -                                                 | 0.279                           | 0.245  | 0.027  | 0.041  | 0.046  | 0.057  | 0.077  |
| Total                                 | 38.464                                            | 33.643                          | 33.498 | 35.964 | 35.833 | 36.001 | 36.102 | 35.195 |
| [HCHO]                                | -                                                 | 1.273                           | 0.332  | 0.759  | 3.109  | 5.457  | 8.744  | 12.574 |
| X <sub>toluene</sub> (mol%)           |                                                   | 10.119                          | 10.220 | 2.622  | 4.312  | 6.992  | 11.392 | 15.829 |
| X <sub>methanol</sub> (mol%)          |                                                   | 14.056                          | 8.931  | 4.002  | 13.716 | 22.253 | 34.326 | 50.704 |
| Y <sub>ST+EB</sub> (mol%)             |                                                   | 0.172                           | 0.163  | 0.939  | 3.748  | 6.667  | 10.787 | 15.406 |
| Y <sub>CO+CO<sub>2</sub></sub> (mol%) |                                                   | 4.878                           | 1.212  | 2.492  | 10.249 | 17.948 | 28.705 | 41.331 |
| ST/EB (mol/mol)                       |                                                   | 0.482                           | 1.176  | 2.591  | 1.887  | 1.094  | 0.707  | 0.329  |
| S <sub>Side-chain</sub> (mol%)        |                                                   | 2.436                           | 2.155  | 39.144 | 87.321 | 98.450 | 99.322 | 99.642 |
| Y <sub>xylene</sub> (mol%)            |                                                   | 6.895                           | 7.422  | 1.460  | 0.544  | 0.105  | 0.074  | 0.055  |
| X <sub>(HCHO to ST+EB)</sub> (mol%)   |                                                   | 1.734                           | 6.315  | 15.856 | 15.457 | 15.663 | 15.817 | 15.709 |
| Y <sub>[HCHO]</sub>                   |                                                   | 4.964                           | 1.294  | 2.961  | 12.123 | 21.281 | 34.098 | 49.034 |
| X <sub>(ST to EB)</sub>               |                                                   | 67.474                          | 45.966 | 27.847 | 34.644 | 47.765 | 58.589 | 75.269 |

\*Reaction conditions: T=430°C; WHSV=2h<sup>-1</sup>; n(toluene)/n(methanol)=1:2.

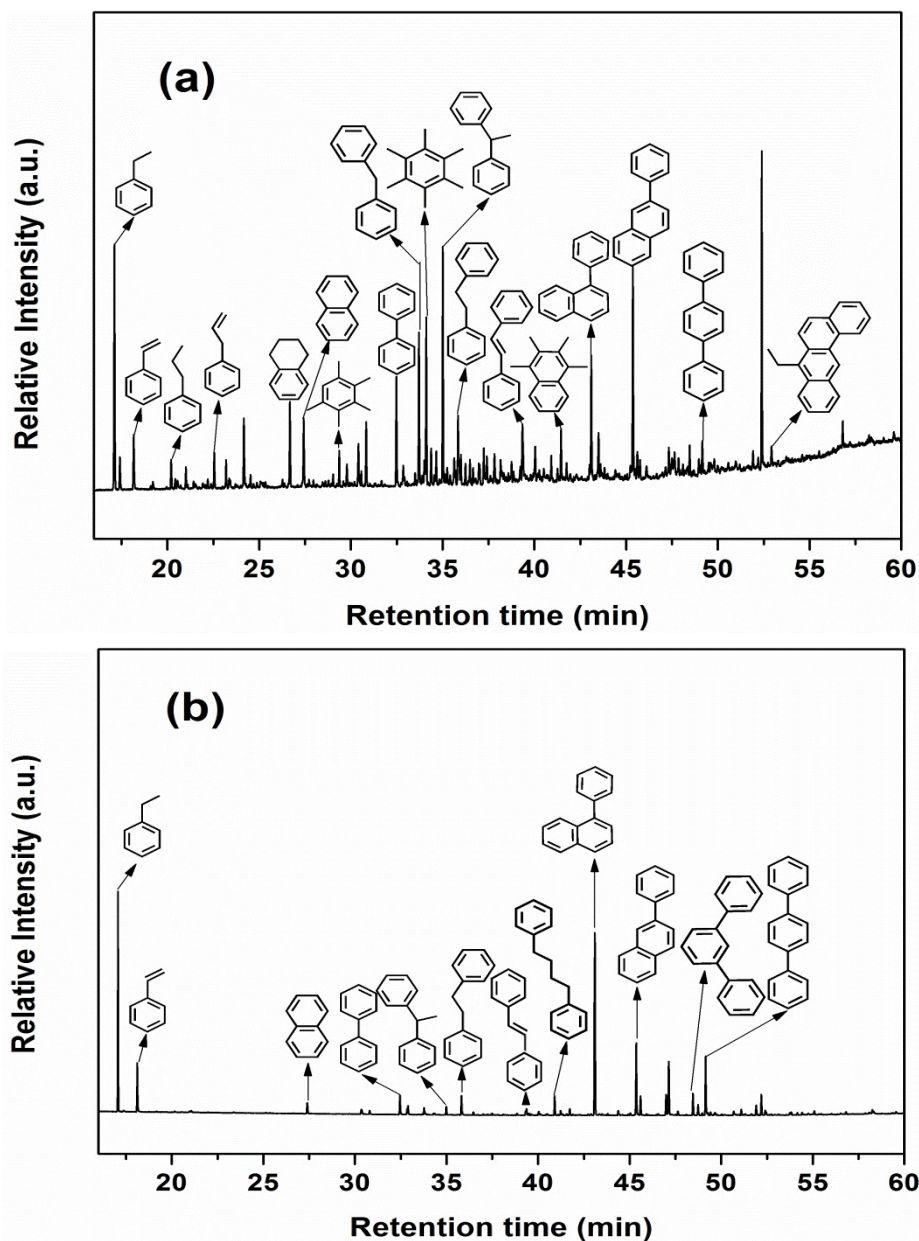

**Fig. S4.** GC-MS analysis of hydrocarbon species trapped in zeolite pores after conversion of styrene with methanol at 430 °C for NaX (a) and CsX-6 (b), the reaction time was 50min.

The hydrocarbon species trapped in the pores of NaX and CsX-6 after reaction between styrene and methanol was analyzed by an Agilent 7890A/7000B GC/MSD. The results are shown in Fig. S4. The retained hydrocarbon species were obtained by dissolving the catalyst in 15% HF in a screw-cap Teflon vial, and then extracted by  $\text{CH}_2\text{Cl}_2$ .
